# Supplementary material for: Phase I single center trial of Ketogenic Diet for Adults with Traumatic Brain Injury
Source: bioRxiv or medRxiv preprint supplement (doi:10.1101/2021.07.19.21260800), 2021-07-22
Supplement: Supplementary file [file media-1.pdf]

**Supplementary table 1: Serum Beta-hydroxybutyrate (BOB) levels (mmol/l) according to days**

| Patient | BOB levels          |       |       |       |       |       |       |       |       |       |        |        |        |        |        |
|---------|---------------------|-------|-------|-------|-------|-------|-------|-------|-------|-------|--------|--------|--------|--------|--------|
|         | Day 0<br>(Baseline) | Day 1 | Day 2 | Day 3 | Day 4 | Day 5 | Day 6 | Day 7 | Day 8 | Day 9 | Day 10 | Day 11 | Day 12 | Day 13 | Day 14 |
| 1       | <0.18               | 0.32  | 0.28  | 0.18  | 0.28  | 0.44  | 0.48  | 0.48  | 0.49  | 0.49  |        |        |        |        |        |
| 2       | <0.18               | 0.18  | <0.18 | <0.18 | <0.18 |       |       |       |       |       |        |        |        |        |        |
| 3       | 0.55                | 0.18  | 0.18  | 0.22  | 0.18  | 0.18  | 0.18  | 0.23  | 0.54  | 0.71  | 0.55   | 0.41   | 0.37   | 1.48   | 1.78   |
| 4       | 0.58                | -     | -     | 1.47  | 0.43  | 0.62  | 0.84  | 0.65  | 0.32  | 0.44  | 0.26   | 0.25   | 0.38   |        |        |
| 5       | 1.53                | 0.84  | 0.69  | 0.46  | 0.42  | 0.62  | 0.62  | 0.37  | 0.92  | 0.89  | -      | 0.89   | 0.26   |        |        |
| 6       | 0.39                | 2.49  | 1.25  | 1.34  | 2.68  | 2.56  | 0.29  |       |       |       |        |        |        |        |        |
| 7       | <0.18               | 0.79  | -     | 0.32  | -     | -     | 0.27  | 0.33  |       |       |        |        |        |        |        |
| 8       | 0.23                | <0.18 | <0.18 | <0.18 | <0.18 | <0.18 | <0.18 | <0.18 | <0.18 | <0.18 | 0.68   |        |        |        |        |
| 9       | <0.18               | 1.34  | -     | 2.32  | 2.32  |       |       |       |       |       |        |        |        |        |        |
| 10      | 0.29                | -     | 0.48  | -     | 2.11  | -     | 3.7   | -     | 3.91  |       |        |        |        |        |        |
