# Supplementary material for: Phase I single center trial of Ketogenic Diet for Adults with Traumatic Brain Injury
Source: bioRxiv or medRxiv preprint supplement (doi:10.1101/2021.07.19.21260800), 2021-07-22
Supplement: Supplementary file [file media-2.pdf]

**Supplementary table 2: Glucose (mg/dl) trend during ICU stay**

| Patient        | 1   | 2   | 3   | 4   | 5   | 6   | 7   | 8   | 9   | 10  |
|----------------|-----|-----|-----|-----|-----|-----|-----|-----|-----|-----|
| Glucose on day |     |     |     |     |     |     |     |     |     |     |
| 0              | 174 | 232 | 180 | 157 | 116 | 135 | 339 | 170 | 186 | 97  |
| 1              | 161 | 163 | 153 | 157 | 107 | 74  | 168 | 136 | 119 | 108 |
| 2              | 138 | 148 | 137 | 138 | 91  | 86  | 241 | 109 | 146 | 89  |
| 3              | 134 | 126 | 115 | 127 | 90  | 71  | 180 | 131 | 219 | 90  |
| 4              | 119 | 117 | 136 | 137 | 102 | 87  | 243 | 119 | 147 | 71  |
| 5              | 123 |     | 156 | 122 | 116 |     | 192 | 129 | 141 | 65  |
| 6              | 105 |     | 135 | 130 | 113 |     | 258 | 125 |     | 78  |
| 7              | 100 |     | 141 |     | 103 |     | 193 | 128 |     | 79  |
| 8              | 96  |     | 143 |     | 94  |     | 178 | 126 |     | 92  |
| 9              |     |     | 137 |     | 103 |     |     | 111 |     | 84  |
| 10             |     |     | 146 |     | 106 |     |     | 118 |     |     |
| 11             |     |     | 123 |     | 86  |     |     | 100 |     |     |
| 12             |     |     | 119 |     | 103 |     |     | 111 |     |     |
| 13             |     |     | 117 |     |     |     |     |     |     |     |
| 14             |     |     | 118 |     |     |     |     |     |     |     |
| 15             |     |     | 127 |     |     |     |     |     |     |     |
