# Supplementary material for: Phase I single center trial of Ketogenic Diet for Adults with Traumatic Brain Injury
Source: bioRxiv or medRxiv preprint supplement (doi:10.1101/2021.07.19.21260800), 2021-07-22
Supplement: Supplementary file [file media-3.pdf]

**Supplementary table 3: Insulin requirements for all patients**

| Patient                        | 1    | 2 | 3    | 4    | 5    | 6    | 7  | 8    | 9 | 10   |
|--------------------------------|------|---|------|------|------|------|----|------|---|------|
| <b>Regular Insulin (Units)</b> |      |   |      |      |      |      |    |      |   |      |
| Day 0                          | none | 3 | none | none | none | none | 66 | none | 3 | None |
| 1                              |      |   |      |      |      |      | 50 |      |   |      |
| 2                              |      |   |      |      |      |      | 50 |      |   |      |
| 3                              |      |   |      |      |      |      | 47 |      |   |      |
| 4                              |      |   |      |      |      |      | 47 |      |   |      |
| 5                              |      |   |      |      |      |      | 42 |      |   |      |
| 6                              |      |   |      |      |      |      | 67 |      |   |      |
| 7                              |      |   |      |      |      |      | 61 |      |   |      |
| 8                              |      |   |      |      |      |      | 68 |      |   |      |
